# Supplementary material for: Regulatory B Cells Involvement in Autoimmune Phenomena Occurring in Pediatric Graves’ Disease Patients
Source: MDPI journal article supplement (doi:10.3390/ijms222010926), 2021-10-10
Supplement: s1 [file s1]

**a**

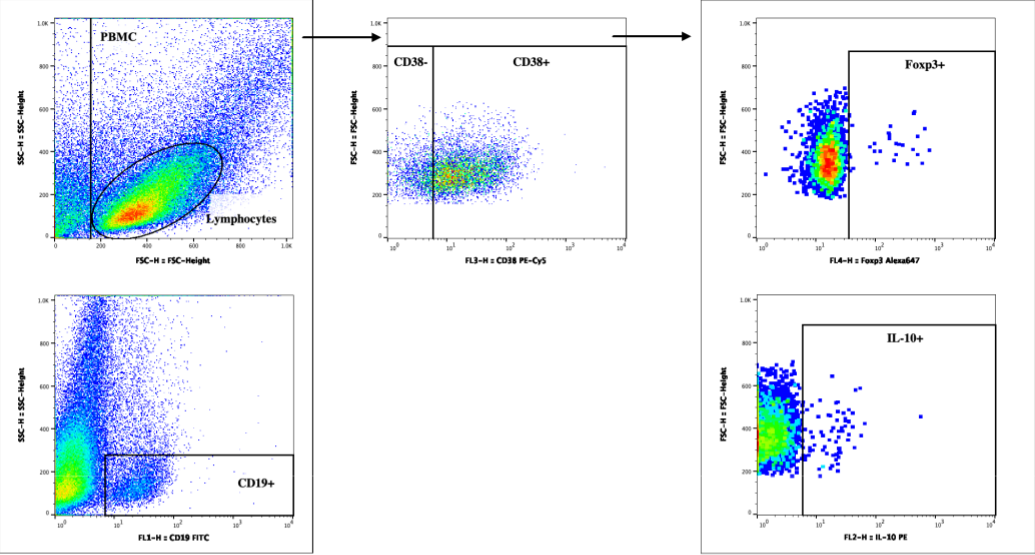

**b**

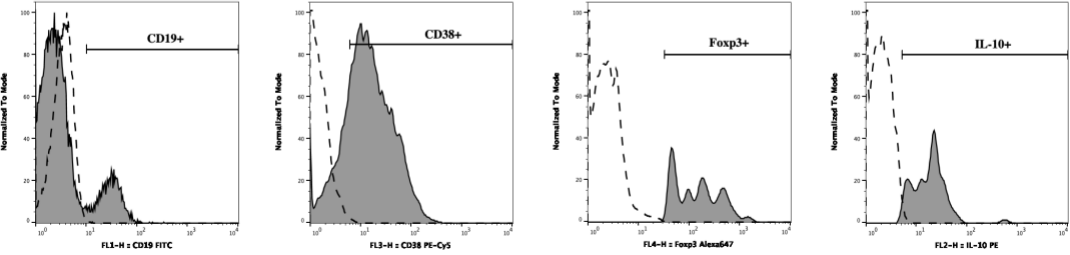

**c**

| Antibody     | CD19  | IL-10    | CD38   | Foxp3           |
|--------------|-------|----------|--------|-----------------|
| Reactivity   | Human | Human    | Human  | Human           |
| Clone        | HIB19 | JES3-9D7 | HIT2   | 259D/C7         |
| Host         | Mouse | Rat      | Mouse  | Mouse           |
| Fluorochrome | FITC  | PE       | PE-Cy5 | Alexa Fluor 647 |

**Supp. Fig S2.** Representative gating strategy implemented in Bregs assessment in Graves patients. Regulatory B cells were distinguished on the basis of morphological properties (FSC/SSC) and presence of surface CD19, followed by gating of CD38-/CD38+ cells and analysis of Foxp3 and/or IL-10 within each population (a). Gating for all the markers used in the study was based on the proper FMO and unstained controls (b). Detailed specification of the monoclonal antibodies used was presented in the table (c).
