# Supplementary material for: Regulatory B Cells Involvement in Autoimmune Phenomena Occurring in Pediatric Graves’ Disease Patients
Source: MDPI journal article supplement (doi:10.3390/ijms222010926), 2021-10-10
Supplement: s1 [file s1]

a

|                                      | Graves-<br>Basedow (GB)<br>Time 0 | Graves-<br>Basedow (GB)<br>Time 1 | Graves-<br>Basedow (GB)<br>Time 2 | Control group<br>(HC) | Normal range |
|--------------------------------------|-----------------------------------|-----------------------------------|-----------------------------------|-----------------------|--------------|
| Age [years]                          | 13.1<br>(± 4.011)                 |                                   |                                   | 12.42<br>(± 3.457)    |              |
| Sex distribution<br>[male to female] | 18% to 82%                        |                                   |                                   | 40% to 60%            |              |
| TSH [mIU/l]                          | 0.598<br>(± 1.273)                | 0.818<br>(± 1.064)                | 6.706<br>(± 11.54)                | 2.245<br>(± 1.128)    | 0.32 – 5.0   |
| fT4 [ng/dl]                          | 4.655<br>(± 3.146)                | 1.185<br>(± 0.677)                | 1.037<br>(± 0.595)                |                       | 0.71 – 1.55  |
| fT3 [ng/l]                           | 19.25<br>(± 12.77)                | 3.855<br>(± 1.637)                | 3.880<br>(± 2.222)                |                       | 2.60 – 5.40  |
| TRAb [IU/l]                          | 25.93<br>(± 13.16)                | 13.93<br>(± 12.26)                | 7.743<br>(± 5.643)                |                       | < 1.7        |

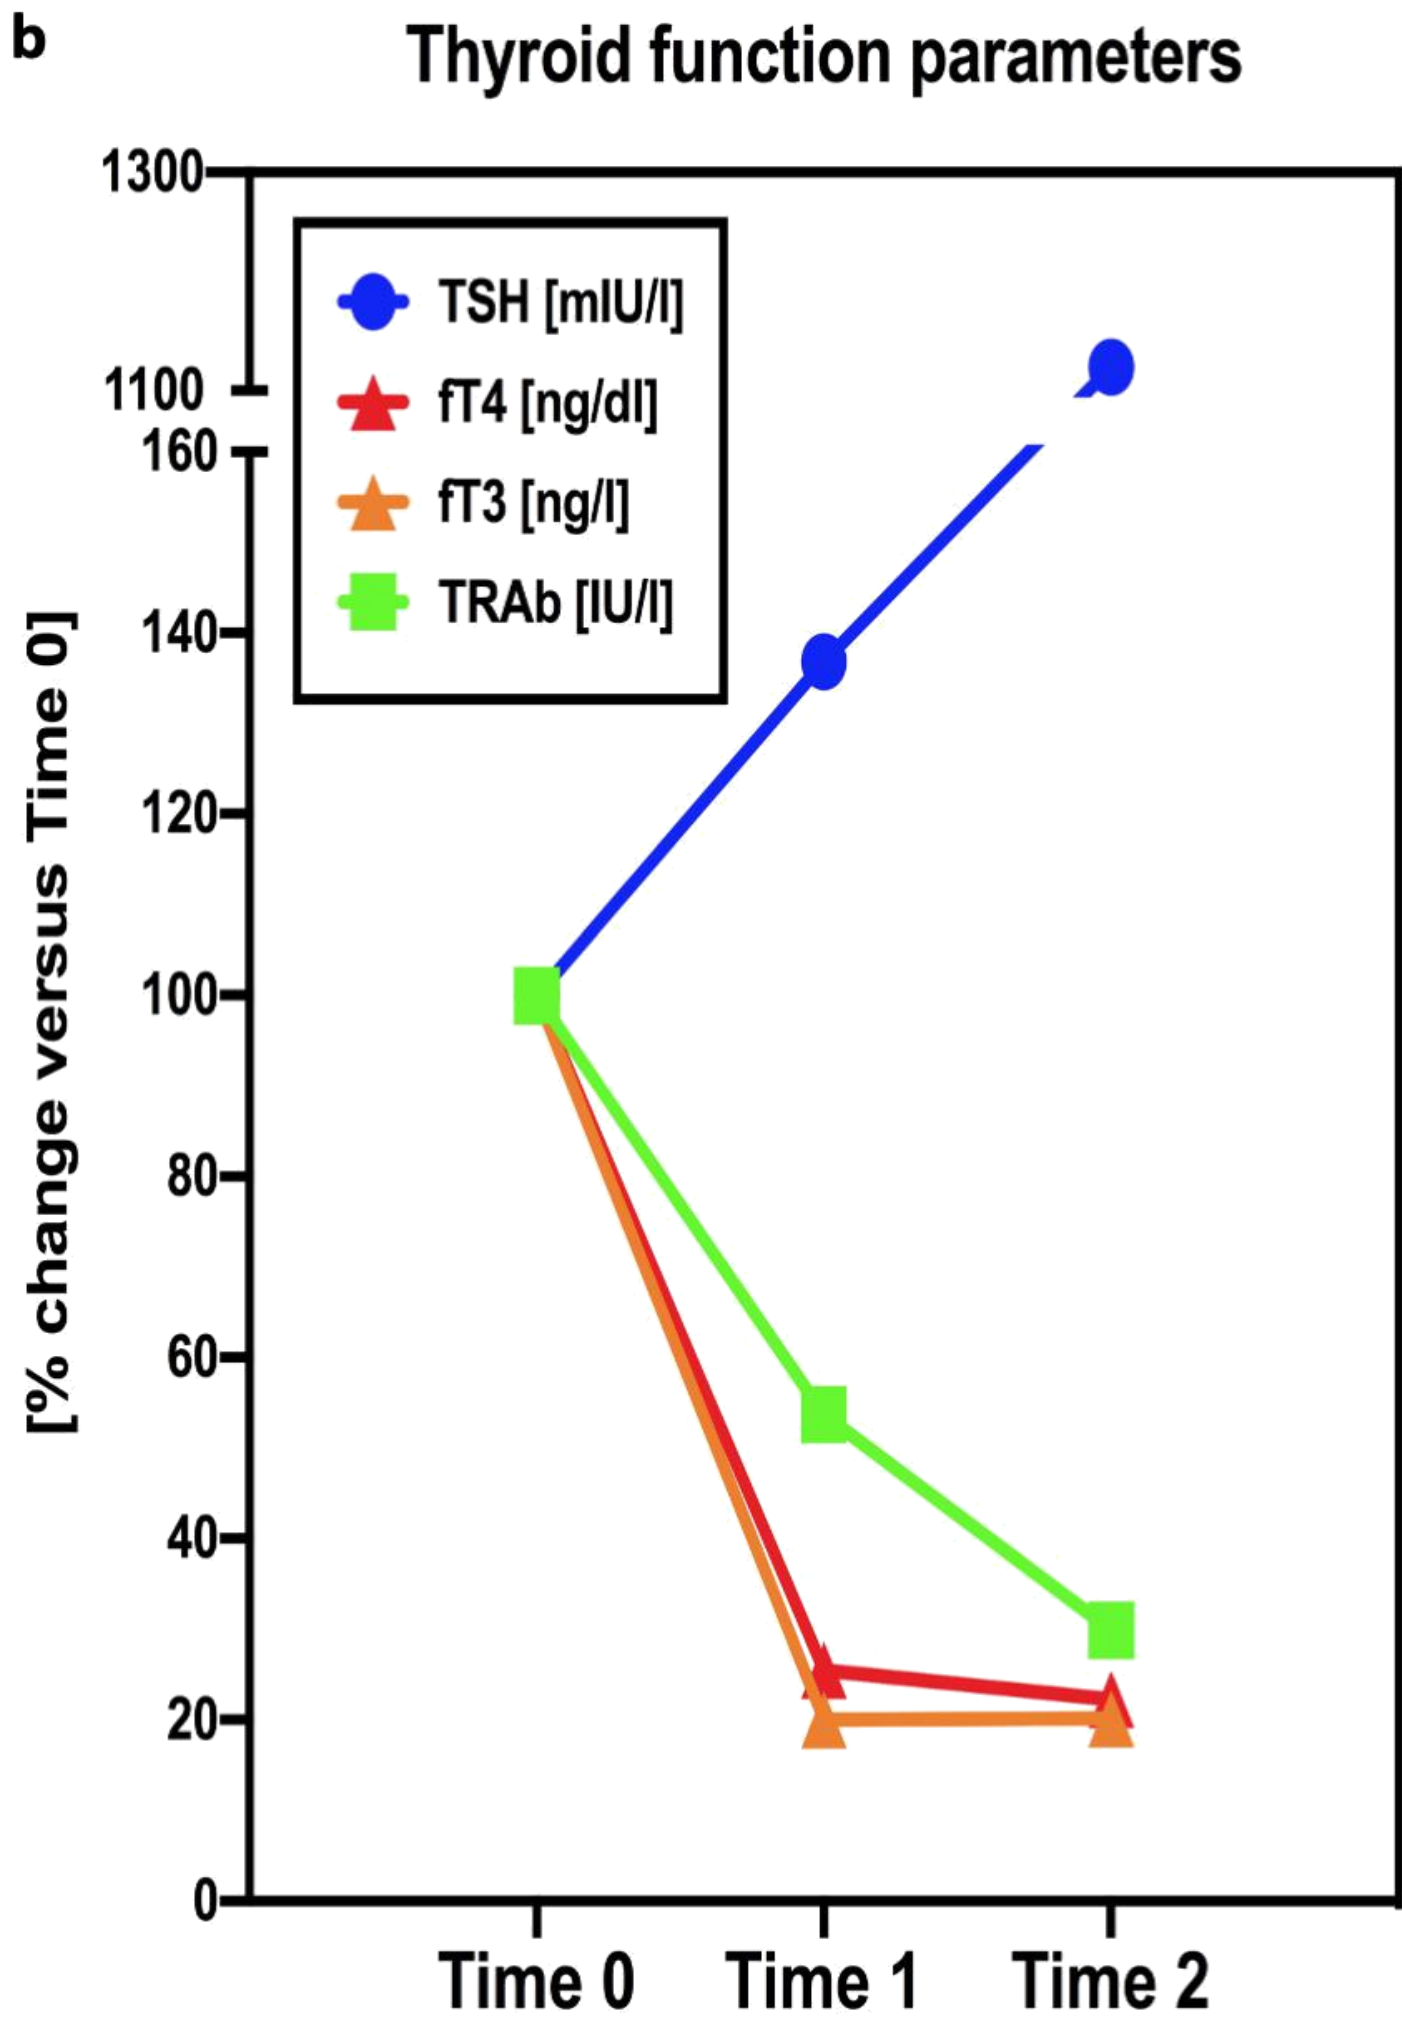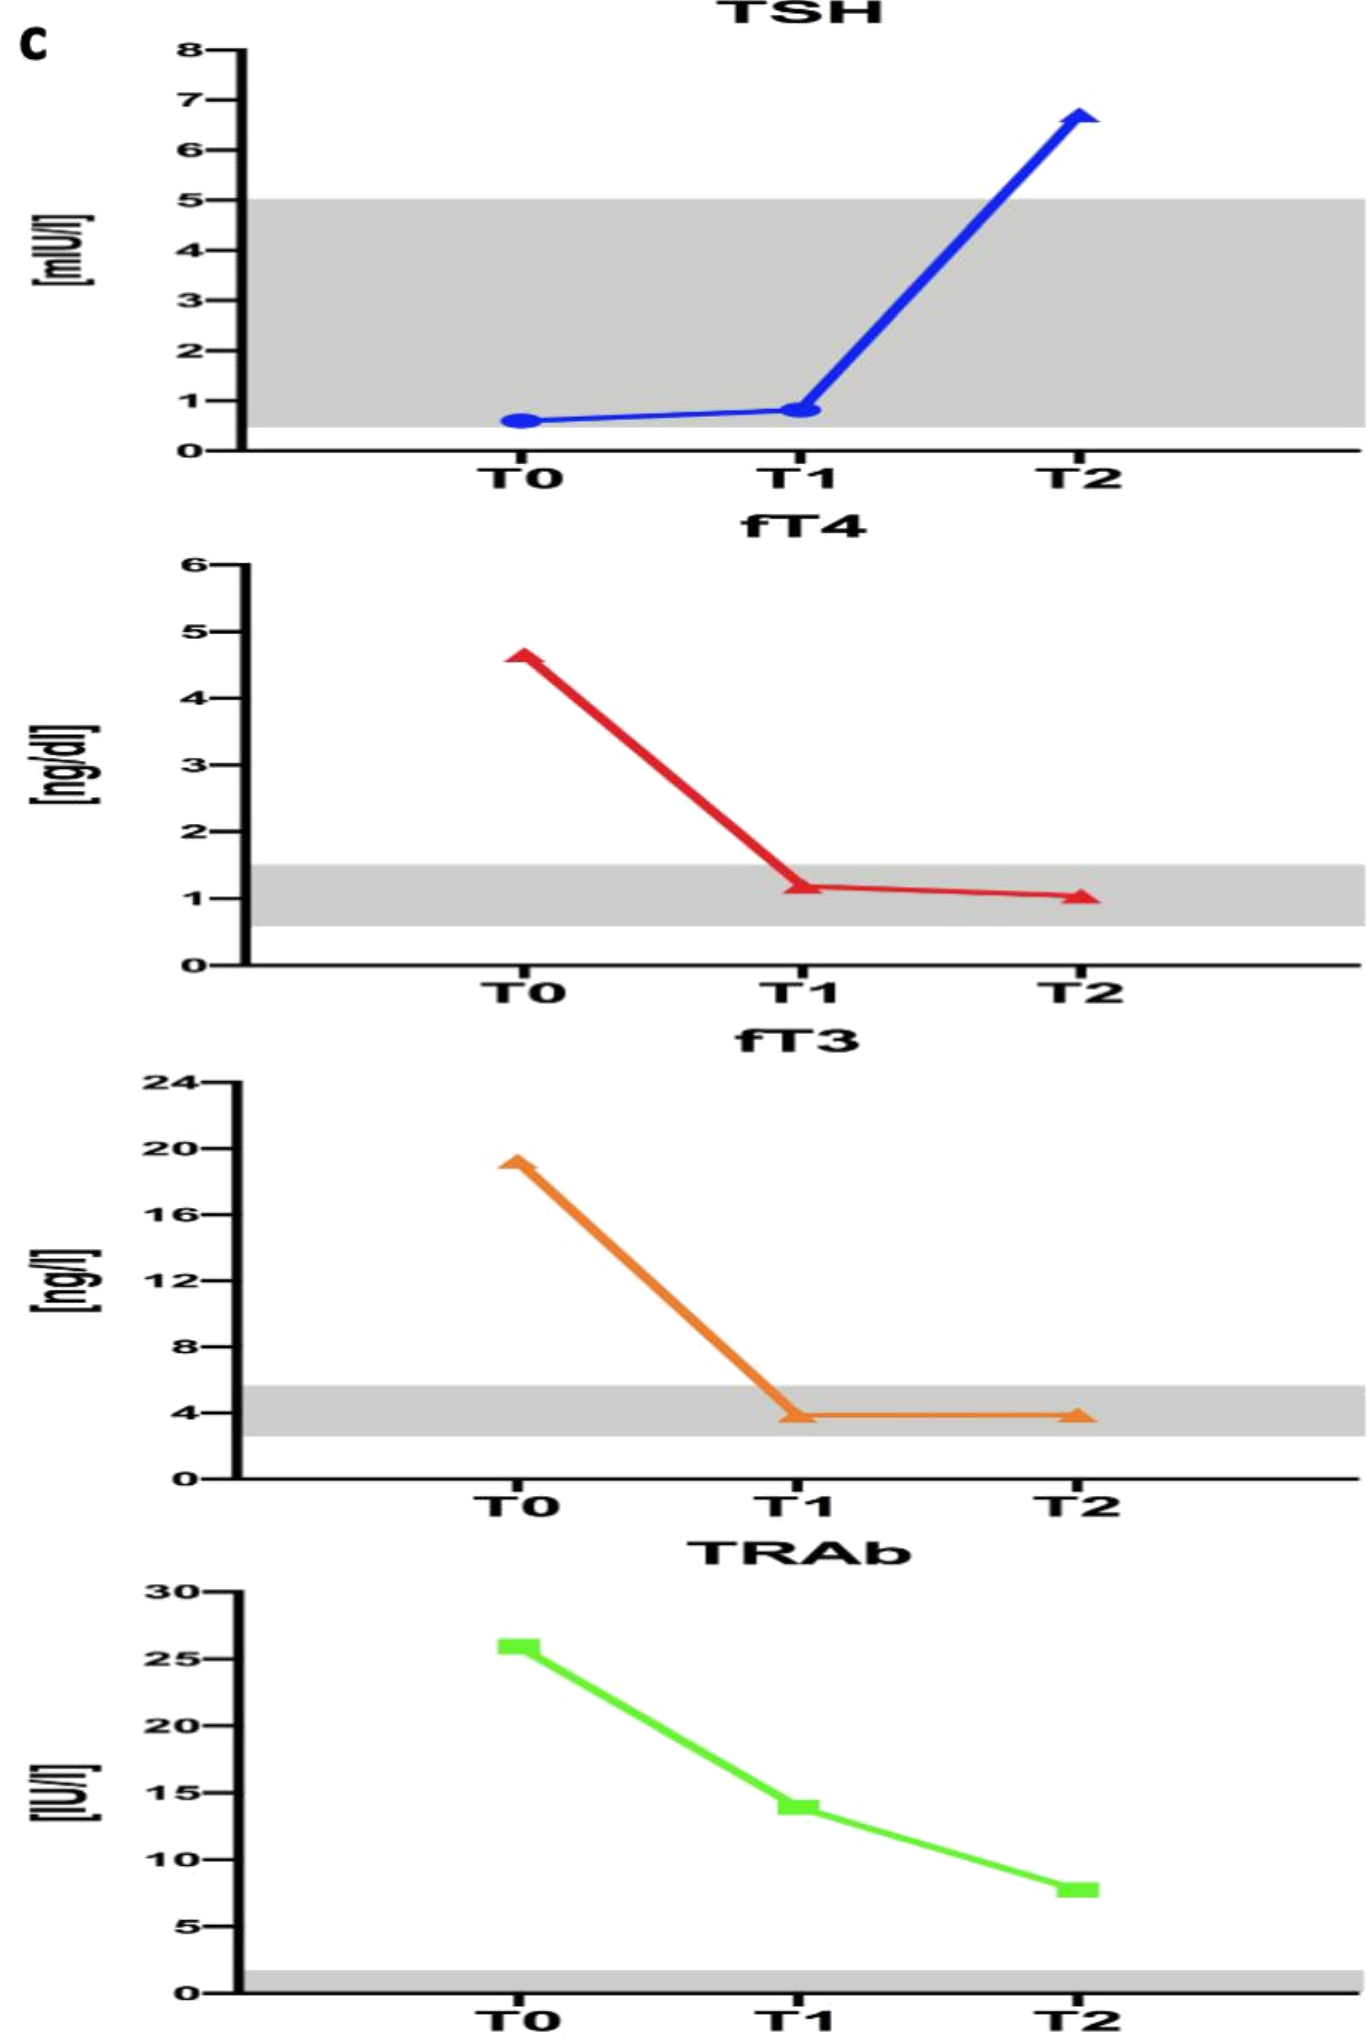

**Supp. Tab. S1.** Descriptive statistics of the studied groups. Tabular presentation of subjects characteristics and thyroid function-related parameters: TSH, free T4 (fT4), free T3 (fT3), TSH receptor antibodies (TRAb) (a). Treatment-related changes in thyroid parameters in the course of methimazole application: cumulative percentage change in laboratory tests results (b), and individual alterations in TSH, fT4, fT3 and TRAb (common units used; grey area indicate normal range values) (c). Data presented as mean values with standard deviation in the brackets.
